# Supplementary material for: Did Dumbo suffer a heart attack? independent association between earlobe crease and cardiovascular disease
Source: BMC Cardiovasc Disord. 2016 Jan 20;16:17. doi: 10.1186/s12872-016-0193-7 (PMC4721195; doi:10.1186/s12872-016-0193-7)
Supplement: Additional file 5: Table S5. — Multivariable analysis of the association between earlobe crease and selected cardiovascular risk factors, CoLaus study, Lausanne, 2009–2012, adjusting for age, gender and waist circumference. (PDF 59 kb) [file 12872_2016_193_MOESM5_ESM.pdf]

**Supplementary table 5:** Multivariable analysis of the association between earlobe crease and selected cardiovascular risk factors,,  
CoLaus study, Lausanne, 2009-2012, adjusting for age, gender and waist circumference.

| Earlobe crease                | Absence<br>(n=3829) | Presence<br>(n=806) | P-value | Absent<br>(n=3829) | Unilateral<br>(n=373) | Bilateral<br>(n=429) | P-value<br>for trend |
|-------------------------------|---------------------|---------------------|---------|--------------------|-----------------------|----------------------|----------------------|
| BMI (kg/m <sup>2</sup> )      | 26.1 ± 0            | 26.4 ± 0.1          | 0.003   | 26.1 ± 0.1         | 26.4 ± 0.1            | 26.4 ± 0.1           | 0.01                 |
| Obesity                       | 1 (ref.)            | 1.12 (0.82; 1.52)   | 0.48    | 1 (ref.)           | 1.40 (0.93; 2.12)     | 0.91 (0.61; 1.36)    | 0.64                 |
| Smoking status                |                     |                     |         |                    |                       |                      |                      |
| Never                         | -                   | -                   | -       | -                  | -                     | -                    | -                    |
| Former                        | 1 (ref.)            | 1.14 (0.95 - 1.36)  | 0.16    | 1 (ref.)           | 0.95 (0.75; 1.21)     | 1.34 (1.06; 1.70)    | NA                   |
| Current                       | 1 (ref.)            | 1.12 (0.90 - 1.40)  | 0.30    | 1 (ref.)           | 0.91 (0.67; 1.23)     | 1.37 (1.03; 1.82)    | NA                   |
| Blood pressure status         |                     |                     |         |                    |                       |                      |                      |
| SBP (mm Hg) <sup>a</sup>      | 126 ± 1             | 126 ± 1             | 0.77    | 126 ± 1            | 126 ± 1               | 126 ± 1              | 0.43                 |
| DBP (mm Hg) <sup>a</sup>      | 78 ± 1              | 78 ± 1              | 0.36    | 78 ± 1             | 79 ± 1                | 78 ± 1               | 0.97                 |
| Hypertension                  | 1 (ref.)            | 1.31 (1.09; 1.56)   | 0.004   | 1 (ref.)           | 1.34 (1.05; 1.72)     | 1.28 (1.01; 1.62)    | 0.04                 |
| Lipids (mmol/L) <sup>b</sup>  |                     |                     |         |                    |                       |                      |                      |
| Total cholesterol             | 5.70 ± 0.02         | 5.68 ± 0.04         | 0.53    | 5.70 ± 0.02        | 5.69 ± 0.05           | 5.66 ± 0.05          | 0.47                 |
| LDL cholesterol               | 3.45 ± 0.01         | 3.44 ± 0.03         | 0.66    | 3.45 ± 0.01        | 3.44 ± 0.05           | 3.43 ± 0.04          | 0.69                 |
| HDL cholesterol               | 1.64 ± 0.01         | 1.63 ± 0.01         | 0.69    | 1.64 ± 0.01        | 1.64 ± 0.02           | 1.62 ± 0.02          | 0.38                 |
| Triglycerides                 | 1.36 ± 0.01         | 1.37 ± 0.03         | 0.47 §  | 1.36 ± 0.01        | 1.38 ± 0.04           | 1.36 ± 0.04          | 0.60 §               |
| Glycaemic status              |                     |                     |         |                    |                       |                      |                      |
| Glucose (mmol/L) <sup>c</sup> | 5.87 ± 0.02         | 5.92 ± 0.04         | 0.23    | 5.87 ± 0.02        | 5.92 ± 0.05           | 5.92 ± 0.05          | 0.31                 |
| Insulin (µIU/mL) <sup>c</sup> | 8.3 ± 0.1           | 8.4 ± 0.2           | 0.43 §  | 8.3 ± 0.1          | 8.6 ± 0.3             | 8.3 ± 0.3            | 0.43 §               |

|                      |           |                   |      |           |                   |                   |      |
|----------------------|-----------|-------------------|------|-----------|-------------------|-------------------|------|
| HOMA-IR <sup>c</sup> | 2.3 ± 0.1 | 2.3 ± 0.1         | 0.47 | 2.3 ± 0.1 | 2.3 ± 0.1         | 2.4 ± 0.1         | 0.41 |
| Diabetes             | 1 (ref.)  | 1.23 (0.97; 1.57) | 0.08 | 1 (ref.)  | 1.28 (0.93; 1.76) | 1.19 (0.88; 1.61) | 0.25 |
| High HOMA-IR         | 1 (ref.)  | 0.97 (0.79; 1.18) | 0.75 | 1 (ref.)  | 1.04 (0.79; 1.36) | 0.91 (0.70; 1.18) | 0.46 |

For quantitative variables, multivariable analyses were performed by ANOVA and the results are expressed as adjusted mean ± standard error. For categorical variables (excluding smoking), multivariable analyses were performed by logistic regression and results are expressed as odds ratio (95% confidence interval). For smoking, multivariable analyses were performed using multivariate (polytomous) logistic regression and the results are expressed as relative risk ratio (95% confidence interval). § P-value calculated on log-transformed values. <sup>a</sup>, adjusting for antihypertensive medication; <sup>b</sup>, adjusting for hypolipidemic medication; <sup>c</sup>, adjusting for antidiabetes medication.

**BMI**, body mass index; **SBP**, systolic blood pressure; **DBP**, diastolic blood pressure; **LDL**, low-density lipoprotein; **HDL**, high-density lipoprotein; **HOMA-IR**, homeostatic model assessment of insulin resistance; **high HOMA-IR** is defined as a HOMA-IR≥2.6; **hypertension** is defined as SBP>140 or DBP>90 mm Hg or antihypertensive medication; **diabetes** is defined as fasting plasma glucose >7.0 mmol/L or antidiabetes medication; **NA**, not assessable.
