# Supplementary material for: Did Dumbo suffer a heart attack? independent association between earlobe crease and cardiovascular disease
Source: Springer Nature journal article supplement (doi:10.1186/s12872-016-0193-7), 2016-01-20
Supplement: MOESM1 [file 9737004]

**Supplementary table 1:** Comparison between included and excluded participants, CoLaus study, Lausanne, 2009-2012.

|                          | Included (N=4635) | Excluded (N=429) | P-value |
|--------------------------|-------------------|------------------|---------|
| Men (%)                  | 2163 (46.7)       | 194 (45.2)       | 0.57    |
| Age (years)              | 57.5 ± 10.5       | 61.0 ± 10.2      | <0.001  |
| BMI (kg/m <sup>2</sup> ) | 26.2 ± 4.6        | 26.3 ± 4.6       | 0.64    |
| BMI categories (%)       |                   |                  |         |
| Normal                   | 2004 (43.8)       | 176 (42.0)       |         |
| Overweight               | 1797 (39.2)       | 163 (38.9)       | 0.54    |
| Obese                    | 779 (17.0)        | 80 (19.1)        |         |
| Abdominal obesity (%)    | 1744 (37.8)       | 194 (45.9)       | <0.001  |
| Smoking status (%)       |                   |                  |         |
| Never                    | 1919 (41.4)       | 173 (40.3)       |         |
| Former                   | 1705 (36.8)       | 178 (41.5)       | 0.09    |
| Current                  | 1011 (21.8)       | 78 (18.2)        |         |
| Blood pressure status    |                   |                  |         |
| SBP (mm Hg)              | 126 ± 18          | 129 ± 19         | 0.003   |
| DBP (mm Hg)              | 78 ± 11           | 78 ± 11          | 0.54    |
| Hypertension (%)         | 1884 (40.7)       | 212 (49.9)       | <0.001  |
| Lipids (mmol/L)          |                   |                  |         |
| Total cholesterol        | 5.7 ± 1.0         | 5.7 ± 1.1        | 0.61    |
| LDL cholesterol          | 3.4 ± 0.9         | 3.4 ± 0.9        | 0.74    |
| HDL cholesterol          | 1.6 ± 0.5         | 1.6 ± 0.5        | 0.84    |
| Triglycerides            | 1.4 ± 0.9         | 1.3 ± 0.8        | 0.80 §  |
| Glycaemic status         |                   |                  |         |
| Glucose (mmol/L)         | 5.9 ± 1.2         | 5.8 ± 1.1        | 0.41    |
| Insulin (µIU/mL)         | 8.4 ± 7.1         | 8.8 ± 7.2        | 0.16 §  |
| Diabetes (%)             | 490 (10.6)        | 49 (11.6)        | 0.53    |
| HOMA-IR                  | 2.3 ± 2.6         | 2.4 ± 2.4        | 0.59    |
| High HOMA-IR (%)         | 1202 (25.9)       | 115 (26.8)       | 0.69    |
| Metabolic syndrome (%)   | 1407 (30.7)       | 141 (33.7)       | 0.19    |

Results are expressed as number of participants (%) or as mean  $\pm$  standard deviation. Statistical analysis by Student's t-test or by chi-square. § P-value calculated on log-transformed values.

**BMI**, body mass index; **abdominal obesity** and **metabolic syndrome** are defined by the NCEP ATP-III criteria; **hypertension** is defined as SBP>140 or DBP>90 mm Hg or antihypertensive medication; **LDL**, low-density lipoprotein; **HDL**, high-density lipoprotein; **HOMA-IR**, homeostatic model assessment of insulin resistance; **high HOMA-IR** is defined as a HOMA-IR $\geq$ 2.6; **diabetes** is defined as fasting plasma glucose >7.0 mmol/L or antidiabetes medication.
