# Supplementary material for: Did Dumbo suffer a heart attack? independent association between earlobe crease and cardiovascular disease
Source: Springer Nature journal article supplement (doi:10.1186/s12872-016-0193-7), 2016-01-20
Supplement: MOESM2 [file 9737004]

**Supplementary table 2** : Sensitivity analysis of presence of earlobe crease regarding cardiovascular risk factors and cardiovascular disease, CoLaus study, Lausanne, 2009-2012.

|                       | <b>Sensitivity</b> | <b>Specificity</b> | <b>PPV</b>         | <b>NPV</b>         |
|-----------------------|--------------------|--------------------|--------------------|--------------------|
| <b>Risk factors</b>   |                    |                    |                    |                    |
| Abdominal obesity     | 20.8 (18.9 - 22.7) | 84.7 (83.3 - 86.0) | 45.2 (41.7 - 48.7) | 63.7 (62.2 - 65.3) |
| Hypertension          | 25.2 (23.3 - 27.2) | 87.9 (86.7 - 89.1) | 58.9 (55.4 - 62.4) | 63.1 (61.6 - 64.7) |
| Diabetes              | 30.0 (26.0 - 34.3) | 84.1 (82.9 - 85.2) | 18.3 (15.7 - 21.1) | 91.0 (90.1 - 91.9) |
| High HOMA-IR          | 23.0 (20.7 - 25.5) | 84.6 (83.3 - 85.8) | 34.4 (31.1 - 37.8) | 75.8 (74.5 - 77.2) |
| Metabolic syndrome    | 24.0 (21.7 - 26.3) | 85.5 (84.2 - 86.7) | 42.1 (38.7 - 45.6) | 71.8 (70.3 - 73.2) |
| <b>History of</b>     |                    |                    |                    |                    |
| Any CVD               | 33.3 (28.5 - 38.4) | 84.0 (82.8 - 85.1) | 15.1 (12.7 - 17.8) | 93.6 (92.8 - 94.4) |
| CAD                   | 39.5 (31.6 - 47.7) | 83.4 (82.3 - 84.5) | 7.5 (5.8 - 9.5)    | 97.6 (97.1 - 98.1) |
| Angina pectoris       | 33.0 (23.5 - 43.6) | 82.9 (81.8 - 84.0) | 3.7 (2.5 - 5.3)    | 98.4 (97.9 - 98.8) |
| Myocardial infarction | 36.2 (26.5 - 46.7) | 83.0 (81.9 - 84.1) | 4.2 (3.0 - 5.9)    | 98.4 (98.0 - 98.8) |
| Stroke                | 31.5 (22.0 - 42.2) | 82.9 (81.8 - 84.0) | 3.5 (2.3 - 5.0)    | 98.4 (98.0 - 98.8) |
| CABG                  | 40.0 (27.0 - 54.1) | 82.9 (81.7 - 83.9) | 2.7 (1.7 - 4.1)    | 99.1 (98.8 - 99.4) |
| <b>High CVD risk</b>  |                    |                    |                    |                    |
| SCOREr.               | 32.2 (28.7 - 35.8) | 85.1 (84.0 - 86.2) | 27.5 (24.4 - 30.7) | 87.8 (86.7 - 88.8) |
| Framingham 1998       | 31.2 (27.2 - 35.4) | 84.3 (83.2 - 85.4) | 20.0 (17.3 - 22.9) | 90.7 (89.8 - 91.6) |
| Framingham 1998r.     | 30.7 (27.2 - 34.4) | 84.8 (83.6 - 85.9) | 24.9 (22.0 - 28.1) | 88.2 (87.1 - 89.2) |

Results are expressed as value and (95% confidence interval). The area under the curve (receiver-operating curve or ROC) can be computed as (Sensitivity + Specificity)/2.

**PPV**, positive predictive value ; **NPV**, negative predictive value ; **HOMA-IR**, homeostatic model assessment of insulin resistance. **High HOMA-IR** is defined as  $\geq 2.6$ ; **abdominal obesity** and **metabolic syndrome** are defined by the NCEP ATP-III criteria; **hypertension** is defined as SBP>140 or DBP>90 or anti-hypertensive medication; **diabetes** is defined as fasting plasma glucose >7.0mmol/L or anti-diabetes medication; **CVD**, cardiovascular diseases; **CAD**, coronary artery disease; **CABG**, Coronary artery bypass graft; **high CVD risk** defined as  $\geq 5\%$ . r.; recalibrated.
