# Supplementary material for: Did Dumbo suffer a heart attack? independent association between earlobe crease and cardiovascular disease
Source: Springer Nature journal article supplement (doi:10.1186/s12872-016-0193-7), 2016-01-20
Supplement: MOESM3 [file 9737004]

**Supplementary table 3:** Bivariate analysis of the association between earlobe crease unilateral or bilateral and selected cardiovascular risk factors, CoLaus study, Lausanne, 2009-2012.

| <b>Earlobe crease</b>    | <b>Absent<br/>(n=3829)</b> | <b>Unilateral<br/>(n=373)</b> | <b>Bilateral<br/>(n=429)</b> | <b>P-value</b> |
|--------------------------|----------------------------|-------------------------------|------------------------------|----------------|
| Men (%)                  | 1708 (44.6)                | 234 (62.7)                    | 217 (50.6)                   | <0.001         |
| Age (years)              | 56.3 ± 10.3                | 62.0 ± 9.5                    | 64.2 ± 9.8                   | <0.001         |
| BMI (kg/m <sup>2</sup> ) | 25.94 ± 4.53               | 27.17 ± 4.75                  | 27.56 ± 4.94                 | <0.001         |
| BMI categories (%)       |                            |                               |                              |                |
| Normal                   | 1749 (87.3)                | 130 (6.5)                     | 125 (6.2)                    |                |
| Overweight               | 1448 (80.6)                | 150 (8.4)                     | 199 (11.1)                   | <0.001         |
| Obese                    | 592 (76.0)                 | 89 (11.4)                     | 98 (12.6)                    |                |
| Abdominal obesity (%)    | 1382 (36.3)                | 157 (42.3)                    | 205 (47.7)                   | <0.001         |
| Smoking status (%)       |                            |                               |                              |                |
| Never                    | 1358 (79.7)                | 150 (8.8)                     | 197 (11.6)                   |                |
| Former                   | 1581 (84.2)                | 153 (8.2)                     | 144 (7.7)                    | <0.001         |
| Current                  | 852 (84.3)                 | 70 (6.9)                      | 89 (8.8)                     |                |
| Blood pressure status    |                            |                               |                              |                |
| SBP (mm Hg)              | 125 ± 17                   | 131 ± 17                      | 132 ± 20                     | <0.001         |
| DBP (mm Hg)              | 78 ± 11                    | 80 ± 11                       | 79 ± 12                      | <0.001         |
| Hypertension (%)         | 1409 (36.9)                | 215 (57.6)                    | 260 (60.1)                   | <0.001         |
| Lipids (mmol/L)          |                            |                               |                              |                |
| Total cholesterol        | 5.70 ± 1.03                | 5.67 ± 1.04                   | 5.70 ± 1.15                  | 0.83           |
| LDL cholesterol          | 3.45 ± 0.92                | 3.43 ± 0.92                   | 3.45 ± 1.03                  | 0.94           |
| HDL cholesterol          | 1.65 ± 0.47                | 1.58 ± 0.45                   | 1.59 ± 0.48                  | <0.01          |
| Triglycerides            | 1.34 ± 0.90                | 1.48 ± 0.96                   | 1.46 ± 0.85                  | <0.001 §       |
| Glycaemic status         |                            |                               |                              |                |
| Glucose (mmol/L)         | 5.83 ± 1.06                | 6.16 ± 1.56                   | 6.22 ± 1.62                  | <0.001         |
| Insulin (µIU/mL)         | 8.06 ± 6.86                | 9.67 ± 8.22                   | 9.82 ± 7.32                  | <0.001 §       |
| Diabetes (%)             | 343 (9.0)                  | 67 (18.0)                     | 80 (18.6)                    | <0.001         |
| HOMA-IR                  | 2.21 ± 2.48                | 2.74 ± 2.67                   | 2.95 ± 3.13                  | <0.001         |
| High HOMA-IR (%)         | 925 (24.2)                 | 129 (34.6)                    | 148 (34.2)                   | <0.001         |
| Metabolic syndrome (%)   | 1070 (28.2)                | 156 (42.1)                    | 181 (42.2)                   | <0.001         |

Results are expressed as number of participants (%) or as mean  $\pm$  standard deviation. Statistical analysis by Student's t-test or by chi-square. § P-value calculated on log-transformed values.

**BMI**, body mass index; **abdominal obesity** and **metabolic syndrome** are defined by the NCEP ATP-III criteria; **hypertension** is defined as SBP>140 or DBP>90 mm Hg or antihypertensive medication; **LDL**, low-density lipoprotein; **HDL**, high-density lipoprotein; **HOMA-IR**, homeostatic model assessment of insulin resistance; **high HOMA-IR** is defined as a HOMA-IR  $\geq$ 2.6; **diabetes** is defined as fasting plasma glucose >7.0 mmol/L or antidiabetes medication.
