# Supplementary material for: Did Dumbo suffer a heart attack? independent association between earlobe crease and cardiovascular disease
Source: Springer Nature journal article supplement (doi:10.1186/s12872-016-0193-7), 2016-01-20
Supplement: MOESM4 [file 9737004]

**Supplementary table 4:** Multivariable analysis of the association between earlobe crease (unilateral or bilateral) and selected cardiovascular risk factors, CoLaus study, Lausanne, 2009-2012.

| Adjusting for                 | Age and gender |                    |                       |                      | Age, gender and body mass index |                    |                       |                      |                      |
|-------------------------------|----------------|--------------------|-----------------------|----------------------|---------------------------------|--------------------|-----------------------|----------------------|----------------------|
|                               | Earlobe crease | Absent<br>(n=3829) | Unilateral<br>(n=373) | Bilateral<br>(n=429) | P-value<br>for trend            | Absent<br>(n=3829) | Unilateral<br>(n=373) | Bilateral<br>(n=429) | P-value<br>for trend |
| BMI (kg/m <sup>2</sup> )      | 26.0 ± 0.1     | 26.8 ± 0.2         | 27.2 ± 0.2            | <0.001               | -                               | -                  | -                     | -                    | -                    |
| Abdominal obesity             | 1 (ref.)       | 1.17 (0.93; 1.46)  | 1.24 (1.00; 1.53)     | 0.05                 | 1 (ref.)                        | 0.95 (0.67; 1.33)  | 0.78 (0.57; 1.06)     |                      | 0.12                 |
| Smoking status                |                |                    |                       |                      |                                 |                    |                       |                      |                      |
| Never                         | -              |                    |                       |                      |                                 |                    |                       |                      |                      |
| Former                        | 1 (ref.)       | 0.97 (0.76; 1.24)  | 1.38 (1.10; 1.75)     | NA                   | 1 (ref.)                        | 0.97 (0.76; 1.24)  | 1.33 (1.05; 1.69)     |                      | NA                   |
| Current                       | 1 (ref.)       | 0.91 (0.67; 1.23)  | 1.33 (1.00; 1.77)     | NA                   | 1 (ref.)                        | 0.96 (0.71; 1.30)  | 1.39 (1.04; 1.86)     |                      | NA                   |
| Blood pressure status         |                |                    |                       |                      |                                 |                    |                       |                      |                      |
| SBP (mm Hg) <sup>a</sup>      | 126 ± 1        | 126 ± 1            | 127 ± 1               | 0.18                 | 126 ± 1                         | 125 ± 1            | 127 ± 1               |                      | 0.37                 |
| DBP (mm Hg) <sup>a</sup>      | 78 ± 1         | 79 ± 1             | 78 ± 1                | 0.43                 | 78 ± 1                          | 79 ± 1             | 78 ± 1                |                      | 0.89                 |
| Hypertension                  | 1 (ref.)       | 1.41 (1.11; 1.79)  | 1.40 (1.12; 1.76)     | 0.003                | 1 (ref.)                        | 1.34 (1.05; 1.72)  | 1.26 (1.00; 1.6)      |                      | 0.054                |
| Lipids (mmol/L) <sup>b</sup>  |                |                    |                       |                      |                                 |                    |                       |                      |                      |
| Total cholesterol             | 5.70 ± 0.02    | 5.69 ± 0.05        | 5.68 ± 0.05           | 0.64                 | 5.70 ± 0.02                     | 5.69 ± 0.05        | 5.66 ± 0.05           |                      | 0.47                 |
| LDL cholesterol               | 3.45 ± 0.01    | 3.45 ± 0.05        | 3.45 ± 0.04           | 0.89                 | 3.45 ± 0.01                     | 3.43 ± 0.05        | 3.43 ± 0.04           |                      | 0.66                 |
| HDL cholesterol               | 1.64 ± 0.01    | 1.63 ± 0.02        | 1.59 ± 0.02           | 0.02                 | 1.64 ± 0.01                     | 1.65 ± 0.02        | 1.63 ± 0.02           |                      | 0.78                 |
| Triglycerides                 | 1.36 ± 0.01    | 1.39 ± 0.05        | 1.41 ± 0.04           | 0.06 §               | 1.36 ± 0.01                     | 1.37 ± 0.04        | 1.35 ± 0.04           |                      | 0.79 §               |
| Glycaemic status              |                |                    |                       |                      |                                 |                    |                       |                      |                      |
| Glucose (mmol/L) <sup>c</sup> | 5.88 ± 0.02    | 5.92 ± 0.05        | 5.98 ± 0.05           | 0.05                 | 5.88 ± 0.02                     | 5.91 ± 0.05        | 5.92 ± 0.05           |                      | 0.64                 |
| Insulin (µIU/mL) <sup>c</sup> | 8.3 ± 0.1      | 8.8 ± 0.4          | 8.8 ± 0.3             | 0.01 §               | 8.3 ± 0.1                       | 8.5 ± 0.3          | 8.3 ± 0.3             |                      | 0.60 §               |
| HOMA-IR <sup>c</sup>          | 2.29 ± 0.04    | 2.38 ± 0.13        | 2.55 ± 0.12           | 0.04                 | 2.3 ± 0.04                      | 2.3 ± 0.11         | 2.37 ± 0.11           |                      | 0.84                 |

|                    |          |                   |                   |      |          |                   |                   |      |
|--------------------|----------|-------------------|-------------------|------|----------|-------------------|-------------------|------|
| Diabetes           | 1 (ref.) | 1.43 (1.06; 1.93) | 1.44 (1.08; 1.91) | 0.01 | 1 (ref.) | 1.29 (0.94; 1.77) | 1.22 (0.90; 1.65) | 0.20 |
| High HOMA-IR       | 1 (ref.) | 1.21 (0.96; 1.53) | 1.17 (0.94; 1.47) | 0.16 | 1 (ref.) | 1.03 (0.78; 1.35) | 0.89 (0.68; 1.15) | 0.36 |
| Metabolic syndrome | 1 (ref.) | 1.31 (1.04; 1.64) | 1.26 (1.01; 1.56) | 0.04 | 1 (ref.) | 1.15 (0.87; 1.51) | 0.94 (0.72; 1.21) | 0.62 |

For quantitative variables, multivariable analyses were performed by ANOVA and the results are expressed as adjusted mean  $\pm$  standard error. For categorical variables (excluding smoking), multivariable analyses were performed by logistic regression and results are expressed as odds ratio (95% confidence interval). For smoking, multivariable analyses were performed using multivariate (polytomous) logistic regression and the results are expressed as relative risk ratio (95% confidence interval). § P-value calculated on log-transformed values. <sup>a</sup>, adjusting for antihypertensive medication; <sup>b</sup>, adjusting for hypolipidemic medication; <sup>c</sup>, adjusting for antidiabetes medication.

**CVRF**, cardiovascular risk factors; **BMI**, body mass index; **SBP**, systolic blood pressure; **DBP**, diastolic blood pressure; **LDL**, low-density lipoprotein; **HDL**, high-density lipoprotein; **HOMA-IR**, homeostatic model assessment of insulin resistance; **high HOMA-IR** is defined as a HOMA-IR  $\geq 2.6$ ; **abdominal obesity** and **metabolic syndrome** are defined by the NCEP ATP-III criteria; **hypertension** is defined as SBP > 140 or DBP > 90 mm Hg or antihypertensive medication; **diabetes** is defined as fasting plasma glucose > 7.0 mmol/L or anti-diabetes medication; **NA**, not assessable.
