# Supplementary material for: Did Dumbo suffer a heart attack? independent association between earlobe crease and cardiovascular disease
Source: Springer Nature journal article supplement (doi:10.1186/s12872-016-0193-7), 2016-01-20
Supplement: MOESM6 [file 9737004]

**Supplementary table 6:** Multivariable analysis of the association between earlobe crease and personal history of cardiovascular disease or cardiovascular risk, CoLaus study, Lausanne, 2009-2012, adjusting for age, gender and waist circumference.

| Earlobe crease             | Absence<br>(n=3829) | Presence<br>(n=806) | P-value | Absent<br>(n=3829) | Unilateral<br>(n=373) | Bilateral<br>(n=429) | P-value<br>for trend |
|----------------------------|---------------------|---------------------|---------|--------------------|-----------------------|----------------------|----------------------|
| History of                 |                     |                     |         |                    |                       |                      |                      |
| Any cardiovascular disease | 1 (ref.)            | 1.47 (1.14; 1.88)   | 0.003   | 1 (ref.)           | 1.44 (1.03; 2.02)     | 1.49 (1.09; 2.03)    | 0.01                 |
| Coronary artery disease    | 1 (ref.)            | 1.76 (1.23; 2.51)   | 0.002   | 1 (ref.)           | 1.91 (1.21; 3.01)     | 1.63 (1.05; 2.55)    | 0.03                 |
| Angina pectoris            | 1 (ref.)            | 1.16 (0.73; 1.86)   | 0.53    | 1 (ref.)           | 1.34 (0.73; 2.47)     | 1.03 (0.57; 1.87)    | 0.93                 |
| Myocardial infarction      | 1 (ref.)            | 1.67 (1.06; 2.62)   | 0.03    | 1 (ref.)           | 1.86 (1.05; 3.28)     | 1.50 (0.85; 2.67)    | 0.16                 |
| Stroke                     | 1 (ref.)            | 1.28 (0.79; 2.06)   | 0.32    | 1 (ref.)           | 1.54 (0.84; 2.83)     | 1.07 (0.57; 2.01)    | 0.83                 |
| CABG                       | 1 (ref.)            | 1.73 (0.97; 3.08)   | 0.06    | 1 (ref.)           | 1.79 (0.85; 3.75)     | 1.69 (0.84; 3.41)    | 0.14                 |
| High CVD risk              |                     |                     |         |                    |                       |                      |                      |
| SCORE recalibrated         | 1 (ref.)            | 1.08 (0.85; 1.36)   | 0.53    | 1 (ref.)           | 0.93 (0.67; 1.29)     | 1.21 (0.91; 1.63)    | 0.19                 |
| Framingham 1998            | 1 (ref.)            | 0.98 (0.75; 1.27)   | 0.85    | 1 (ref.)           | 1.02 (0.72; 1.43)     | 0.94 (0.67; 1.32)    | 0.70                 |
| Framingham 1998 r.         | 1 (ref.)            | 1.02 (0.80; 1.32)   | 0.86    | 1 (ref.)           | 1.07 (0.77; 1.48)     | 0.98 (0.70; 1.36)    | 0.90                 |

Results are expressed as adjusted odds ratio (95% confidence interval) for presence relative to the absence of earlobe crease. Statistical analysis by logistic regression. **CVD**, cardiovascular disease; **CABG**, Coronary artery bypass graft; **high CVD risk** is defined as a 10-year risk  $\geq 5\%$  for SCORE and as a 10-year risk  $\geq 20\%$  for Framingham. r. recalibrated.
