# Supplementary material for: Did Dumbo suffer a heart attack? independent association between earlobe crease and cardiovascular disease
Source: Springer Nature journal article supplement (doi:10.1186/s12872-016-0193-7), 2016-01-20
Supplement: MOESM7 [file 9737004]

**Supplementary table 7:** Multivariable analysis of the association between earlobe crease and personal history of cardiovascular disease, CoLaus study, Lausanne, 2009-2012, adjusted for age, gender, waist circumference, total cholesterol, hypertension, diabetes and smoking.

| <b>Earlobe crease</b>        | <b>Absence<br/>(n=3829)</b> | <b>Presence<br/>(n=806)</b> | <b>P-value</b> | <b>Absent<br/>(n=3829)</b> | <b>Unilateral<br/>(n=373)</b> | <b>Bilateral<br/>(n=429)</b> | <b>P-value<br/>for trend</b> |
|------------------------------|-----------------------------|-----------------------------|----------------|----------------------------|-------------------------------|------------------------------|------------------------------|
| Any cardiovascular disease   | 1 (ref.)                    | 1.36 (1.05; 1.77)           | 0.02           | 1 (ref.)                   | 1.39 (0.97; 1.97)             | 1.34 (0.97; 1.86)            | 0.08                         |
| Coronary artery disease      | 1 (ref.)                    | 1.63 (1.12; 2.36)           | 0.01           | 1 (ref.)                   | 1.90 (1.18; 3.06)             | 1.42 (0.89; 2.27)            | 0.14                         |
| Angina pectoris              | 1 (ref.)                    | 1.05 (0.65; 1.69)           | 0.84           | 1 (ref.)                   | 1.25 (0.67; 2.33)             | 0.91 (0.50; 1.67)            | 0.76                         |
| Myocardial infarction        | 1 (ref.)                    | 1.55 (0.96; 2.48)           | 0.07           | 1 (ref.)                   | 1.87 (1.04; 3.37)             | 1.30 (0.71; 2.37)            | 0.40                         |
| Stroke                       | 1 (ref.)                    | 1.21 (0.74; 1.96)           | 0.44           | 1 (ref.)                   | 1.49 (0.81; 2.74)             | 1.00 (0.53; 1.88)            | 1.00                         |
| Coronary artery bypass graft | 1 (ref.)                    | 1.63 (0.90; 2.95)           | 0.11           | 1 (ref.)                   | 1.82 (0.85; 3.90)             | 1.49 (0.72; 3.09)            | 0.28                         |

Results are expressed as adjusted odds ratio (95% confidence interval) for presence relative to the absence of earlobe crease. Statistical analysis by logistic regression.
