# Supplementary material for: Did Dumbo suffer a heart attack? independent association between earlobe crease and cardiovascular disease
Source: Springer Nature journal article supplement (doi:10.1186/s12872-016-0193-7), 2016-01-20
Supplement: MOESM8 [file 9737004]

**Supplementary table 8:** Bivariate association between earlobe crease (unilateral or bilateral) and history of cardiovascular disease, CoLaus study, Lausanne, 2009-2012.

| <b>Earlobe crease</b>        | <b>Absent<br/>(n=3829)</b> | <b>Unilateral<br/>(n=373)</b> | <b>Bilateral<br/>(n=429)</b> | <b>P-value</b> |
|------------------------------|----------------------------|-------------------------------|------------------------------|----------------|
| Any cardiovascular disease   | 244 (6.4)                  | 52 (13.9)                     | 70 (16.2)                    | <0.001         |
| Coronary artery disease      | 92 (2.4)                   | 28 (7.5)                      | 32 (7.4)                     | <0.001         |
| Angina pectoris              | 61 (1.6)                   | 14 (3.8)                      | 16 (3.7)                     | <0.001         |
| Myocardial infarction        | 60 (1.6)                   | 17 (4.6)                      | 17 (3.9)                     | <0.001         |
| Stroke                       | 61 (1.6)                   | 14 (3.8)                      | 14 (3.3)                     | <0.001         |
| Coronary artery bypass graft | 33 (0.9)                   | 10 (2.7)                      | 12 (2.8)                     | <0.001         |

Results are expressed as number of participants (column %). Statistical analysis by chi-square.
