# Supplementary material for: Did Dumbo suffer a heart attack? independent association between earlobe crease and cardiovascular disease
Source: Springer Nature journal article supplement (doi:10.1186/s12872-016-0193-7), 2016-01-20
Supplement: MOESM9 [file 9737004]

**Supplementary table 9:** Multivariable association between earlobe crease (unilateral or bilateral) and history of cardiovascular disease, CoLaus study, Lausanne, 2009-2012.

| Adjusted for            | Age and gender                       |                       |                      |                      | Age, gender and body mass index |                       |                      |                      |
|-------------------------|--------------------------------------|-----------------------|----------------------|----------------------|---------------------------------|-----------------------|----------------------|----------------------|
|                         | Earlobe crease<br>Absent<br>(n=3829) | Unilateral<br>(n=373) | Bilateral<br>(n=429) | P-value for<br>trend | Absent<br>(n=3829)              | Unilateral<br>(n=373) | Bilateral<br>(n=429) | P-value<br>for trend |
| Any CVD                 | 1 (ref.)                             | 1.48 (1.06; 2.07)     | 1.61 (1.18; 2.18)    | <0.01                | 1 (ref.)                        | 1.42 (1.01; 2.00)     | 1.50 (1.10; 2.06)    | 0.01                 |
| Coronary artery disease | 1 (ref.)                             | 1.95 (1.24; 3.07)     | 1.76 (1.14; 2.73)    | 0.01                 | 1 (ref.)                        | 1.93 (1.22; 3.04)     | 1.70 (1.09; 2.65)    | 0.02                 |
| Angina pectoris         | 1 (ref.)                             | 1.41 (0.77; 2.59)     | 1.18 (0.66; 2.10)    | 0.58                 | 1 (ref.)                        | 1.35 (0.73; 2.49)     | 1.06 (0.59; 1.93)    | 0.84                 |
| Myocardial infarction   | 1 (ref.)                             | 1.86 (1.06; 3.27)     | 1.53 (0.87; 2.71)    | 0.15                 | 1 (ref.)                        | 1.69 (0.95; 3.03)     | 1.51 (0.85; 2.68)    | 0.16                 |
| Stroke                  | 1 (ref.)                             | 1.56 (0.85; 2.85)     | 1.17 (0.64; 2.15)    | 0.61                 | 1 (ref.)                        | 1.60 (0.87; 2.95)     | 1.06 (0.55; 2.02)    | 0.87                 |
| CABG                    | 1 (ref.)                             | 1.74 (0.83; 3.62)     | 1.67 (0.83; 3.35)    | 0.15                 | 1 (ref.)                        | 1.58 (0.73; 3.41)     | 1.74 (0.86; 3.52)    | 0.12                 |

Results are expressed as age and gender-adjusted odds ratio (95% confidence interval). Statistical analysis by logistic regression.

**CVD**, cardiovascular disease; **CABG**, coronary artery bypass graft.
