# Supplementary material for: Did Dumbo suffer a heart attack? independent association between earlobe crease and cardiovascular disease
Source: Springer Nature journal article supplement (doi:10.1186/s12872-016-0193-7), 2016-01-20
Supplement: MOESM10 [file 9737004]

**Supplementary table 10:** Bivariate analysis of the association between earlobe crease and physical activity, adipokines or liver markers, CoLaus study, Lausanne, 2009-2012.

| Earlobe crease         | Absence (n=3829) | Presence (n=806) | P-value |
|------------------------|------------------|------------------|---------|
| TEE (kcal/day)         | 2686 ± 641       | 2679 ± 625       | 0.78    |
| Sedentary (%)          | 1833 (57.0)      | 378 (58.9)       | 0.38    |
| Adipokines (ng/mL) §   |                  |                  |         |
| Leptin                 | 4813 ± 6099      | 5530 ± 7386      | <0.05   |
| Adiponectin            | 4962 ± 4291      | 4860 ± 4195      | 0.37    |
| Uric acid (mmol/L)     | 308 ± 79         | 335 ± 87         | <0.001  |
| Creatinine (µmol/L)    | 79.2 ± 18.6      | 83.7 ± 18.0      | <0.001  |
| Liver enzymes (IU/L) § |                  |                  |         |
| ASAT                   | 28.9 ± 11.8      | 29.7 ± 10.9      | <0.01   |
| ALAT                   | 27.5 ± 17.6      | 28.5 ± 16.1      | <0.01   |
| γ-GT                   | 36.0 ± 46.7      | 43.7 ± 55.2      | <0.001  |
| Alkaline phosphatase   | 62.4 ± 19.9      | 64.5 ± 20.5      | <0.01   |

Results are expressed as number of participants (%) or as mean ± standard deviation.

Statistical analysis by Student's t-test. § P-value calculated on log-transformed values.

**TEE**, total energy expenditure; **ASAT**, aspartate aminotransferase; **ALAT**, alanine aminotransferase; **γ-GT**, γ-glutamyl transpeptidase; **Sedentary** is defined as expending less than 10% of the daily energy in moderate- and high-intensity activities (at least 4 times the basal metabolic rate).
