# Supplementary material for: Did Dumbo suffer a heart attack? independent association between earlobe crease and cardiovascular disease
Source: Springer Nature journal article supplement (doi:10.1186/s12872-016-0193-7), 2016-01-20
Supplement: MOESM11 [file 9737004]

**Supplementary table 11:** Multivariable analysis of the association between ELC and physical activity, adipokines or liver markers, CoLaus study, Lausanne, 2009-2012.

| Earlobe crease       | Adjusted for age and gender |                     |          | Adjusted for age, gender and body mass index |                     |         |
|----------------------|-----------------------------|---------------------|----------|----------------------------------------------|---------------------|---------|
|                      | Absence<br>(n=3829)         | Presence<br>(n=806) | P-value  | Absence<br>(n=3829)                          | Presence<br>(n=806) | P-value |
| TEE (kcal/day)       | 2683±9                      | 2698±20             | 0.47     | 2688±8                                       | 2671±19             | 0.39    |
| Sedentary            | 1 (ref.)                    | 0.94 (0.78; 1.13)   | 0.50     | 1 (ref.)                                     | 0.89 (0.74; 1.07)   | 0.20    |
| Adipokines (ng/mL)   |                             |                     |          |                                              |                     |         |
| Leptin               | 4791 ± 99                   | 5637 ± 225          | <0.001 § | 4916 ± 76                                    | 5016 ± 173          | 0.70 §  |
| Adiponectin          | 4984 ± 68                   | 4756 ± 31           | 0.15 §   | 4953 ± 67                                    | 4843 ± 153          | 0.48 §  |
| Uric acid (mmol/L)   | 311 ± 1.1                   | 318 ± 2.5           | 0.01     | 312 ± 1.1                                    | 314 ± 2.4           | 0.46    |
| Creatinine (µmol/L)  | 79.9 ± 0.3                  | 80.4 ± 0.6          | 0.48     | 79.9 ± 0.3                                   | 80.4 ± 0.6          | 0.53    |
| Liver enzymes (IU/L) |                             |                     |          |                                              |                     |         |
| ASAT                 | 29.0 ± 0.2                  | 28.8 ± 0.4          | 0.71 §   | 29.1 ± 0.2                                   | 28.6 ± 0.4          | 0.39 §  |
| ALAT                 | 27.6 ± 0.3                  | 28.0 ± 0.6          | 0.17 §   | 27.8 ± 0.3                                   | 27.4 ± 0.6          | 0.89 §  |
| γ-GT                 | 36.9 ± 0.8                  | 39.6 ± 1.7          | 0.09 §   | 37.1 ± 0.8                                   | 38.9 ± 1.7          | 0.39 §  |
| Alkaline phosphatase | 62.9 ± 0.3                  | 62.1 ± 0.7          | 0.44 §   | 63.0 ± 0.3                                   | 61.6 ± 0.7          | 0.12 §  |

Results are expressed as adjusted mean ± standard error for quantitative variables and as odds ratio (95% confidence interval) for categorical variables. Statistical analysis by ANOVA for quantitative variables and by logistic regression for categorical variables. § P-value calculated on log-transformed values.

**TEE**, total energy expenditure; **ASAT**, aspartate aminotransferase; **ALAT**, alanine aminotransferase; **γ-GT**, γ-glutamyl transpeptidase; **Sedentary** is defined as expending less than 10% of the daily energy in moderate- and high-intensity activities (at least 4 times the basal metabolic rate).
