# Supplementary material for: Did Dumbo suffer a heart attack? independent association between earlobe crease and cardiovascular disease
Source: Springer Nature journal article supplement (doi:10.1186/s12872-016-0193-7), 2016-01-20
Supplement: MOESM12 [file 9737004]

**Supplementary table 12:** Multivariable analysis of the association between earlobe crease and physical activity, adipokines or liver markers, CoLaus study, Lausanne, 2009-2012, adjusted for age, gender and waist circumference.

| <b>Earlobe crease</b> | <b>Absence<br/>(n=3829)</b> | <b>Presence<br/>(n=806)</b> | <b>P-value</b> | <b>Absent<br/>(n=3829)</b> | <b>Unilateral<br/>(n=373)</b> | <b>Bilateral<br/>(n=429)</b> | <b>P-value<br/>for trend</b> |
|-----------------------|-----------------------------|-----------------------------|----------------|----------------------------|-------------------------------|------------------------------|------------------------------|
| TEE (kcal/day)        | 2685 ± 8                    | 2679 ± 19                   | 0.76           | 2686 ± 8                   | 2707 ± 27                     | 2653 ± 26                    | 0.24                         |
| Sedentary             | 1 (ref.)                    | 0.89 (0.74; 1.07)           | 0.23           | 1 (ref.)                   | 0.74 (0.58; 0.95)             | 1.07 (0.83; 1.37)            | 0.60                         |
| Adipokines (ng/mL)    |                             |                             |                |                            |                               |                              |                              |
| Leptin                | 4870 ± 80                   | 5133 ± 181                  | 0.24 §         | 4870 ± 80                  | 5144 ± 259                    | 5124 ± 247                   | 0.67 §                       |
| Adiponectin           | 4965 ± 67                   | 4850 ± 153                  | 0.47 §         | 4965 ± 67                  | 4770 ± 218                    | 4924 ± 208                   | 0.64 §                       |
| Uric acid (mmol/L)    | 312 ± 1                     | 315 ± 2                     | 0.27           | 312 ± 1                    | 319 ± 3                       | 311 ± 3                      | 0.72                         |
| Creatinine (µmol/L)   | 80 ± 1                      | 80 ± 1                      | 0.53           | 80 ± 1                     | 80 ± 1                        | 80 ± 1                       | 0.53                         |
| Liver enzymes (IU/L)  |                             |                             |                |                            |                               |                              |                              |
| ASAT                  | 29.1 ± 0.2                  | 28.6 ± 0.4                  | 0.35 §         | 29.1 ± 0.2                 | 28.8 ± 0.6                    | 28.5 ± 0.6                   | 0.22 §                       |
| ALAT                  | 27.7 ± 0.3                  | 27.4 ± 0.6                  | 0.88 §         | 27.7 ± 0.3                 | 27.6 ± 0.8                    | 27.3 ± 0.8                   | 0.49 §                       |
| γ-GT                  | 37.0 ± 0.8                  | 38.6 ± 1.7                  | 0.49 §         | 37.0 ± 0.8                 | 40.5 ± 2.4                    | 37.0 ± 2.3                   | 0.64 §                       |
| Alkaline phosphatase  | 63.0 ± 0.3                  | 61.6 ± 0.7                  | 0.10 §         | 63.0 ± 0.3                 | 61.9 ± 1.0                    | 61.3 ± 0.9                   | 0.23 §                       |

Results are expressed as adjusted mean ± standard error for quantitative variables and as odds ratio (95% confidence interval) for categorical variables. Statistical analysis by ANOVA for quantitative variables and by logistic regression for categorical variables. § P-value calculated on log-transformed values.

**TEE**, total energy expenditure; **ASAT**, aspartate aminotransferase; **ALAT**, alanine aminotransferase; **γ-GT**, γ-glutamyl transpeptidase; **Sedentary** is defined as expending less than 10% of the daily energy in moderate- and high-intensity activities (at least 4 times the basal metabolic rate).
