# Supplementary material for: Did Dumbo suffer a heart attack? independent association between earlobe crease and cardiovascular disease
Source: Springer Nature journal article supplement (doi:10.1186/s12872-016-0193-7), 2016-01-20
Supplement: MOESM13 [file 9737004]

**Supplementary table 13:** Bivariate association between earlobe crease and quartiles of inflammatory markers, CoLaus study, Lausanne, 2009-2012.

| Earlobe crease                      | Absence (n=3829) | Presence (n=806) | P-value |
|-------------------------------------|------------------|------------------|---------|
| High sensitivity C-reactive protein |                  |                  |         |
| First                               | 1177 (30.9)      | 175 (21.8)       | <0.001  |
| Second                              | 827 (21.7)       | 185 (23.0)       |         |
| Third                               | 925 (24.2)       | 213 (26.5)       |         |
| Fourth                              | 884 (23.2)       | 231 (28.7)       |         |
| Interleukin-1 $\beta$               |                  |                  |         |
| First                               | 930 (26.1)       | 190 (26.1)       | 0.58    |
| Second                              | 824 (23.1)       | 170 (23.4)       |         |
| Third                               | 910 (25.6)       | 170 (23.4)       |         |
| Fourth                              | 899 (25.2)       | 197 (27.1)       |         |
| Interleukin-6                       |                  |                  |         |
| First                               | 888 (24.9)       | 193 (26.5)       | 0.82    |
| Second                              | 886 (24.8)       | 182 (25.0)       |         |
| Third                               | 901 (25.3)       | 178 (24.4)       |         |
| Fourth                              | 890 (25.0)       | 176 (24.1)       |         |
| Tumour necrosis factor- $\alpha$    |                  |                  |         |
| First                               | 927 (26.0)       | 155 (21.3)       | <0.05   |
| Second                              | 890 (24.9)       | 179 (23.3)       |         |
| Third                               | 869 (24.4)       | 201 (27.6)       |         |
| Fourth                              | 881 (24.7)       | 203 (27.8)       |         |

Results are expressed as number of participants (%). Statistical analysis by chi-square.
