# Supplementary material for: Did Dumbo suffer a heart attack? independent association between earlobe crease and cardiovascular disease
Source: Springer Nature journal article supplement (doi:10.1186/s12872-016-0193-7), 2016-01-20
Supplement: MOESM14 [file 9737004]

**Supplementary table 14:** Multivariable association between earlobe crease and being in the highest quartile of inflammatory markers, CoLaus study, Lausanne, 2009-2012.

| Earlobe crease                | Adjusted for age and gender |                     |         | Adjusted for age, gender and body mass index |                     |         |
|-------------------------------|-----------------------------|---------------------|---------|----------------------------------------------|---------------------|---------|
|                               | Absence<br>(n=3829)         | Presence<br>(n=806) | P-value | Absence<br>(n=3829)                          | Presence<br>(n=806) | P-value |
| Quartiles                     |                             |                     |         |                                              |                     |         |
| Hs-CRP                        | 1 (ref.)                    | 1.19 (1.00; 1.42)   | 0.056   | 1 (ref.)                                     | 1.04 (0.86; 1.26)   | 0.66    |
| Interleukin-1 $\beta$         | 1 (ref.)                    | 1.22 (1.01; 1.48)   | 0.04    | 1 (ref.)                                     | 1.23 (1.02; 1.49)   | 0.03    |
| Interleukin-6                 | 1 (ref.)                    | 0.98 (0.81; 1.19)   | 0.84    | 1 (ref.)                                     | 0.98 (0.81; 1.19)   | 0.87    |
| TNF- $\alpha$                 | 1 (ref.)                    | 1.08 (0.90; 1.30)   | 0.81    | 1 (ref.)                                     | 1.04 (0.86; 1.25)   | 0.70    |
| Log-transformed values §      |                             |                     |         |                                              |                     |         |
| Hs-CRP (mg/dL)                | 1.37 $\pm$ 1.02             | 1.52 $\pm$ 1.04     | 0.02    | 1.39 $\pm$ 1.02                              | 1.41 $\pm$ 1.04     | 0.73    |
| Interleukin-1 $\beta$ (pg/mL) | 1.49 $\pm$ 1.03             | 1.65 $\pm$ 1.07     | 0.15    | 1.49 $\pm$ 1.03                              | 1.65 $\pm$ 1.07     | 0.14    |
| Interleukin-6 (pg/mL)         | 3.53 $\pm$ 1.03             | 3.24 $\pm$ 1.06     | 0.22    | 3.55 $\pm$ 1.03                              | 3.24 $\pm$ 1.07     | 0.19    |
| TNF- $\alpha$ (pg/mL)         | 4.70 $\pm$ 1.02             | 4.83 $\pm$ 1.04     | 0.53    | 4.74 $\pm$ 1.02                              | 4.77 $\pm$ 1.04     | 0.87    |

Results are expressed as adjusted mean  $\pm$  standard error for quantitative variables and as odds ratio (95% confidence interval) for categorical variables. Statistical analysis by ANOVA for quantitative variables and by logistic regression for categorical variables. § excluding participants with undetectable values. **Hs-CRP**, high sensitivity C-reactive protein; **TNF- $\alpha$** , tumour necrosis factor alpha.
