# Supplementary material for: Did Dumbo suffer a heart attack? independent association between earlobe crease and cardiovascular disease
Source: Springer Nature journal article supplement (doi:10.1186/s12872-016-0193-7), 2016-01-20
Supplement: MOESM15 [file 9737004]

**Supplementary table 15:** Multivariable association between earlobe crease and being in the highest quartile of inflammatory markers, CoLaus study, Lausanne, 2009-2012, adjusted for age, gender and waist circumference.

| Earlobe crease                | Absence<br>(n=3829) | Presence<br>(n=806) | P-value | Absent<br>(n=3829) | Unilateral<br>(n=373) | Bilateral<br>(n=429) | P-value<br>for trend |
|-------------------------------|---------------------|---------------------|---------|--------------------|-----------------------|----------------------|----------------------|
| Quartiles                     |                     |                     |         |                    |                       |                      |                      |
| Hs-CRP                        | 1 (ref.)            | 1.06 (0.87; 1.27)   | 0.58    | 1 (ref.)           | 1.17 (0.90; 1.51)     | 0.97 (0.76; 1.23)    | 0.78                 |
| Interleukin-1 $\beta$         | 1 (ref.)            | 1.22 (1.01; 1.48)   | 0.04    | 1 (ref.)           | 1.16 (0.90; 1.50)     | 1.28 (1.00; 1.63)    | 0.05                 |
| Interleukin-6                 | 1 (ref.)            | 0.98 (0.81; 1.19)   | 0.82    | 1 (ref.)           | 0.96 (0.73; 1.25)     | 1.00 (0.77; 1.28)    | 0.98                 |
| TNF- $\alpha$                 | 1 (ref.)            | 1.05 (0.87; 1.27)   | 0.59    | 1 (ref.)           | 1.11 (0.87; 1.43)     | 1.00 (0.78; 1.28)    | 1.00                 |
| Log-transformed values §      |                     |                     |         |                    |                       |                      |                      |
| Hs-CRP (mg/dL)                | 0.33 $\pm$ 0.02     | 0.35 $\pm$ 0.03     | 0.50    | 0.33 $\pm$ 0.02    | 0.40 $\pm$ 0.05       | 0.31 $\pm$ 0.05      | 0.69                 |
| Interleukin-1 $\beta$ (pg/mL) | 0.40 $\pm$ 0.03     | 0.51 $\pm$ 0.07     | 0.15    | 0.40 $\pm$ 0.03    | 0.53 $\pm$ 0.09       | 0.49 $\pm$ 0.09      | 0.36                 |
| Interleukin-6 (pg/mL)         | 1.26 $\pm$ 0.03     | 1.17 $\pm$ 0.06     | 0.17    | 1.26 $\pm$ 0.03    | 1.14 $\pm$ 0.09       | 1.19 $\pm$ 0.09      | 0.44                 |
| TNF- $\alpha$ (pg/mL)         | 1.55 $\pm$ 0.02     | 1.56 $\pm$ 0.04     | 0.83    | 1.55 $\pm$ 0.02    | 1.57 $\pm$ 0.06       | 1.56 $\pm$ 0.05      | 0.95                 |

Results are expressed as adjusted mean  $\pm$  standard error for quantitative variables and as odds ratio (95% confidence interval) for categorical variables. Statistical analysis by ANOVA for quantitative variables and by logistic regression for categorical variables. § excluding participants with undetectable values. **Hs-CRP**, high sensitivity C-reactive protein; **TNF- $\alpha$** , tumour necrosis factor alpha.
